# Supplementary material for: Synthesis of MnOOH and its application in a supporting hexagonal Pd/C catalyst for the oxygen reduction reaction
Source: Royal Society of Chemistry journal article supplement (doi:10.1039/d3nr04724e), 2023-11-23
Supplement: d3nr04724e1.pdf [file d3nr04724e1.pdf]

# Synthesis of MnOOH and its application in supporting hexagonal Pd/C catalyst for oxygen reduction reaction

Zheng Cheng, Wei Cheng, Xin-Ning Lin, Rong-Hua Zhang\*, Luo-Yi Yan, Gui-Xian Tian,

Xiao-Yu Shen, Xin-Wen Zhou\*

*College of Materials and Chemical Engineering, China Three Gorges University, Yichang 443002, China*

Corresponding authors: rhzhang@ctgu.edu.cn; xwzhou@ctgu.edu.cn

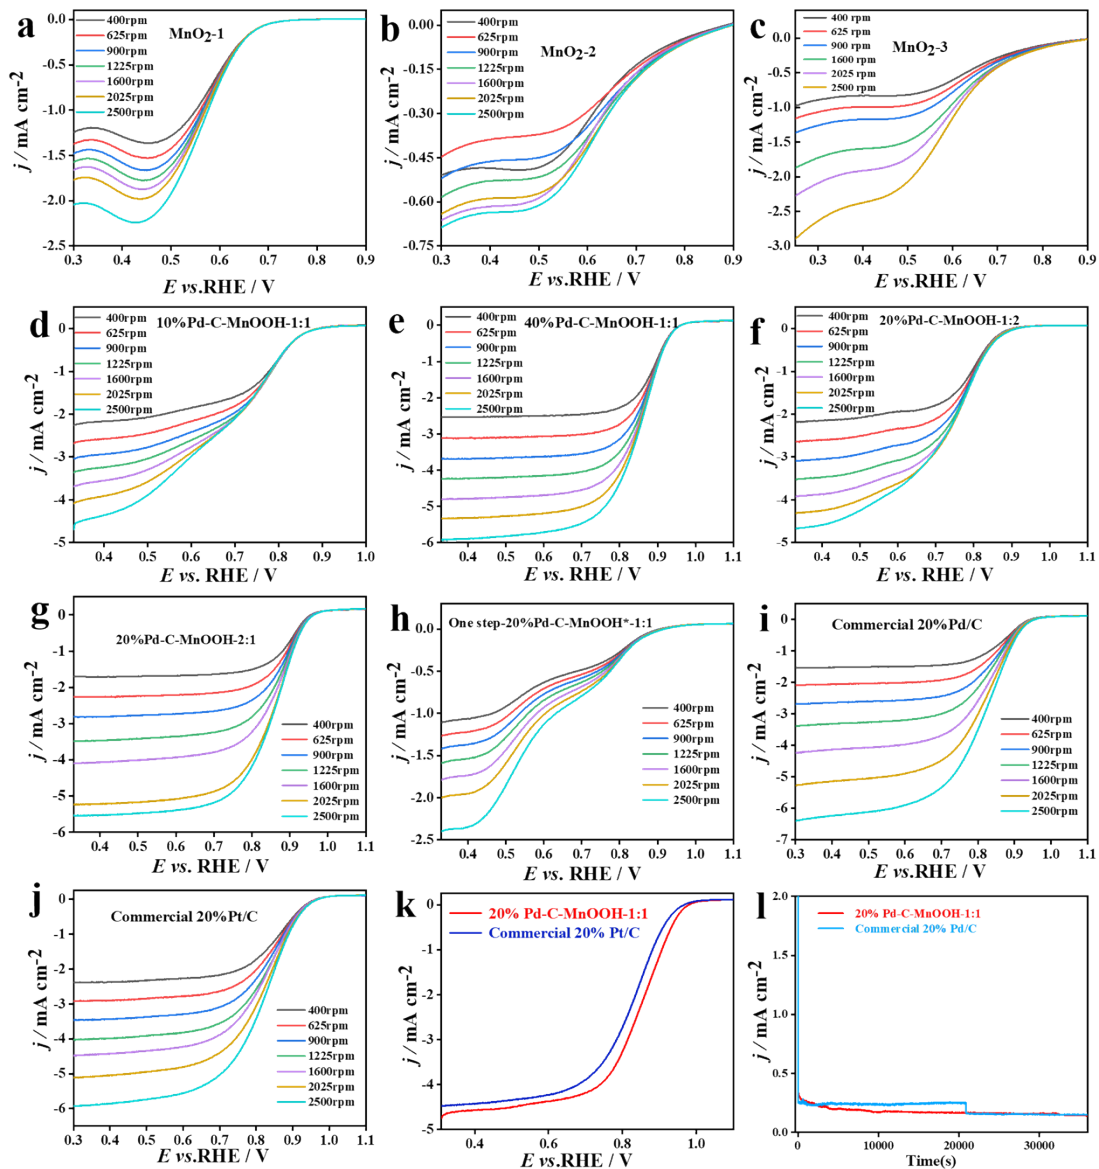

Fig. S1. LSV curves of (a)  $\text{MnO}_2\text{-1}$ , (b)  $\text{MnO}_2\text{-2}$ , (c)  $\text{MnO}_2\text{-3}$ , (d) 10%Pd-C-MnOOH-1:1, (e) 40%Pd-C-MnOOH-1:1, (f) 20%Pd-C-MnOOH-1:2, (g) 20%Pd-C-MnOOH-2:1, (h) 20%Pd-C-MnOOH\*-1:1, (i) commercial Pd/C catalysts and (j) commercial Pt/C catalysts with different speed in an oxygen-saturated 1.0 M KOH solution, (k) 20%Pd-C-MnOOH-1:1 and commercial Pt/C catalysts at 1600 rpm in an oxygen-saturated 1.0 M KOH solution, (l) The *i-t* images of 20%Pd-C-MnOOH-1:1 and Pd/C were tested under saturated oxygen atmosphere in 0.1M KOH solution for 10 hours.

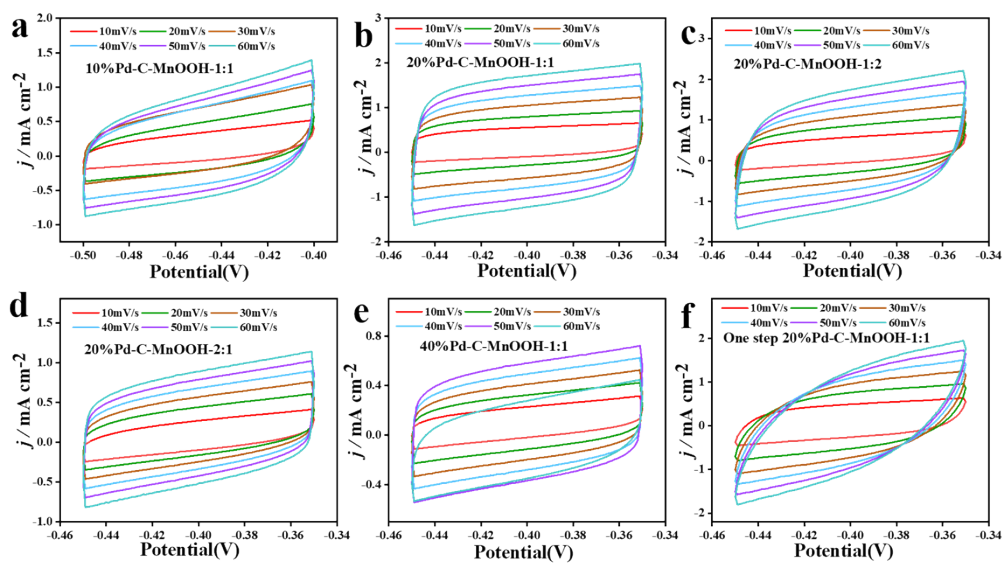

Fig. S2. CV curves of different Pd-C-MnOOH catalysts between -0.45 and -0.35 V (vs SCE) in 1.0 M KOH solution with different scan rates.

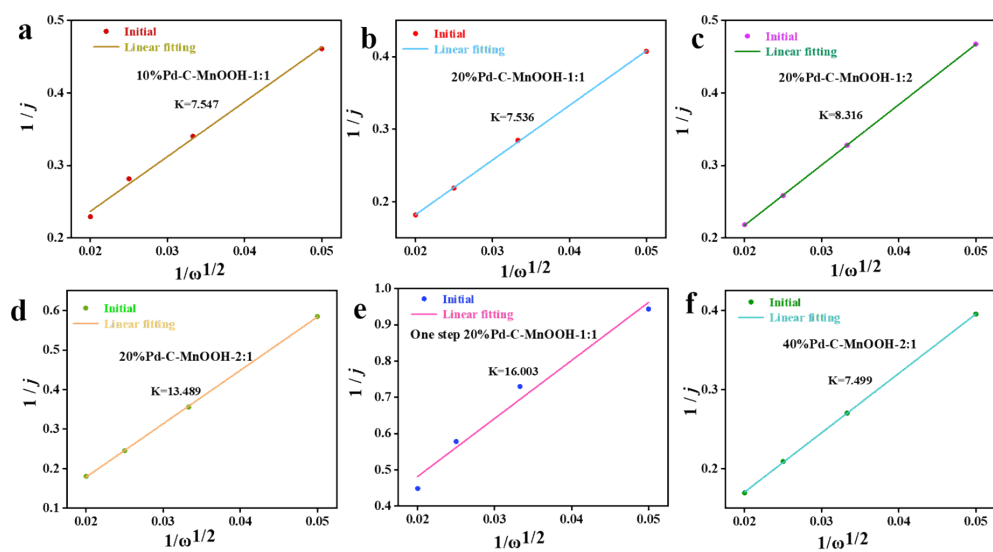

Fig. S3. Electrochemical active area (CdI) curves of different Pd-C-MnOOH catalysts. (a) 10%Pd-C-MnOOH-1:1, (b) 20%Pd-C-MnOOH-1:1, (c) 40%Pd-C-MnOOH-1:1, (d) 20%Pd-C-MnOOH-1:2, (e) 20%Pd-C-MnOOH-2:1, (e) 20%Pd-C-MnOOH\*-1:1, (f) commercial Pd/C catalysts.

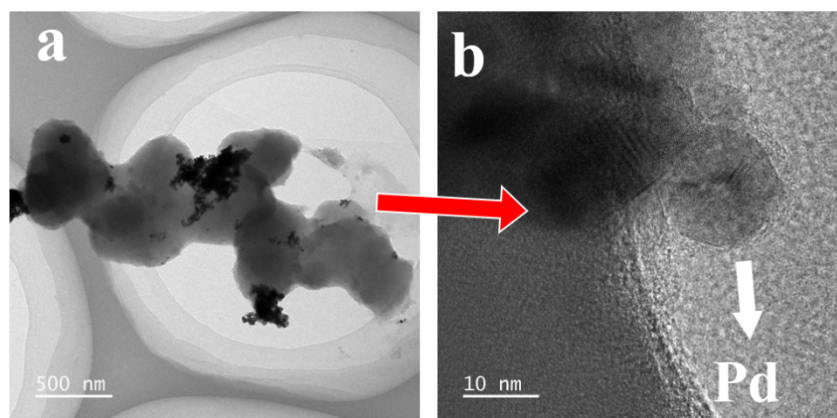

Fig. S4. (a)TEM and (b) HRTEM images of 20%Pd-C-MnOOH-1:1 catalyst after use.

**Table S1** ORR activity comparison table of similar palladium-based catalysts

| Catalyst                       | $j$<br>(mAcm <sup>-2</sup> ) | $E_{1/2}$<br>(V) | Electrolyte | Rotational<br>speed(rpm) | Reference |
|--------------------------------|------------------------------|------------------|-------------|--------------------------|-----------|
| MnO <sub>2</sub>               | -3.78                        | 0.52             | 0.1 M KOH   | 2500                     | 8         |
| MnOOH                          | -3.83                        | 0.74             | 0.1 M KOH   | 1600                     | 1         |
| MnO <sub>2</sub> /C            | -5.51                        | 0.61             | 0.1 M KOH   | 2500                     | 8         |
| MnO <sub>2</sub> /C-3:7        | -2.58                        | 0.66             | 0.1 M KOH   | 1600                     | 2         |
| 10%Pd/MnO <sub>2</sub>         | -4.72                        | 0.78             | 0.1 M KOH   | 1600                     | 2         |
| Pd/MnO <sub>2</sub>            | -5.52                        | 0.67             | 0.1 M KOH   | 1600                     | 3         |
| Pd/MnO <sub>2</sub>            | -3.75                        | 0.76             | 0.5 M NaOH  | 1600                     | 5         |
| Pd/MnO <sub>2</sub>            | -4.56                        | 0.83             | 0.1 M KOH   | 1600                     | 7         |
| Pd/ $\alpha$ -MnO <sub>2</sub> | -4.38                        | 0.67             | 0.1 M KOH   | 1600                     | 6         |
| Pd-HSAG                        | -4.20                        | 0.84             | 0.1 M KOH   | 1600                     | 4         |
| Pd/MnO <sub>2</sub> -CNT       | -6.48                        | 0.72             | 0.1 M KOH   | 1600                     | 3         |
| 8.7%Pd/MnO <sub>2</sub>        | -5.82                        | 0.68             | 0.1 M KOH   | 2500                     | 8         |
| 8.7%Pd/Mn-C                    | -6.70                        | 0.74             | 0.1 M KOH   | 2500                     | 8         |
| 20%Pd/C/MnOOH                  | -4.78                        | 0.84             | 0.1 M KOH   | 1600                     | This work |

## References

- [1] D. P. Liu, J. Tian, Y. G. Tang, J. S. Li, S. A. Wu, S. J. Yi, X. B. Huang, D. Sun, H. Y. Wang, *Chem. Eng. J.*, 2021, **406**, 126772.
- [2] I. Cruz-Reyes, B. Trujillo-Navarrete, K. Garcia-Tapia, M. I. Salazar-Gastelum, F. Paraguay-Delgado, R. M. Felix-Navarro, *Fuel*, 2020, **279**, 118470.
- [3] W. K. Xiang, Y. H. Zhao, Z. Jiang, X. P. Li, H. Zhang, Y. Sun, Z. J. Ning, F. P. Du, P. Gao, J. Qian, K. C. Kato, M. Yamauchi, Y. H. Sun, *J. Mater. Chem. A*, 2018, **6**, 23366.

- [4] M. Nunes, D. M. Fernandes, M. V. Morales, I. Rodriguez-Ramos, A. Guerrero-Ruiz, C. Freire, *Catal Today*, 2020, **357**, 279-290.
- [5] R. Adhikary, A. De, S. Chattopadhyay, J. Datta, *Energy Fuels*, 2022, **36**, 14411-14422.
- [6] M. M. Liu, S. Hu, Y. J. Zhang, C. Y. Zhao, W. Q. Jiang, C. H. Qi, X. H. Zhu, P. P. Qiu, Y. Sun, K. C. Kato, Y. H. Zhao, X. P. Li, M. Yamauchi, W. Luo, *Adv. Mater. Interfaces*, 2021, **8**, 2002060.
- [7] Y. Wang, J. L. Liu, H. J. Yuan, F. Liu, T. J. Hu, B. Q. Yang, *Adv. Mater. Interfaces*, 2023, **33**, 2211909.
- [8] W. Sun, A. Hsu, R. R. Chen, *J. Power Sources*, 2011, **196**, 4491-4498.
